# Supplementary material for: Team-based primary care reforms and older adults: a descriptive assessment of sociodemographic trends and prescribing endpoints in two Canadian provinces
Source: Springer Nature journal article supplement (doi:10.1186/s12875-022-01960-z), 2023-01-10

## APPENDICES

### Appendix 1: CIHI list of ADEs

The ADE definition is derived from the CIHI (2013) definition:

- A most responsible diagnosis code that was either drug-related or due to a drug (see table below), provided that the most responsible diagnosis was not indicated to have occurred post-admission; or
- A pre-admission comorbidity that was either drug related or due to a drug (see table below); or
- An external cause code that was drug-related (ICD-10 codes Y40 to Y59).

Cases where the most responsible diagnosis occurred post-admission are excluded. These cases can be identified when the same diagnosis was coded as both the most responsible diagnosis and a post-admission comorbidity.

| ICD-10-CA Code | Description                                                      | ICD-10-CA Code | Description                                                                                  |
|----------------|------------------------------------------------------------------|----------------|----------------------------------------------------------------------------------------------|
| D52.1          | Drug-induced folate deficiency anaemia                           | M10.25         | Drug-induced gout, pelvic region and thigh                                                   |
| D59.0          | Drug-induced autoimmune haemolytic anaemia                       | M10.26         | Drug-induced gout, lower leg                                                                 |
| D59.2          | Drug-induced nonautoimmune haemolytic anaemia                    | M10.27         | Drug-induced gout, ankle and foot                                                            |
| D61.1          | Drug-induced aplastic anaemia                                    | M10.28         | Drug-induced gout, other site                                                                |
| D64.2          | Secondary sideroblastic anaemia due to drugs and toxins          | M10.29         | Drug-induced gout, unspecified site                                                          |
| D68.3          | Haemorrhagic disorder due to circulating anticoagulants          | M32.0          | Drug-induced systemic lupus erythematosus                                                    |
| D89.3          | Immune reconstitution syndrome                                   | M34.2          | Systemic sclerosis induced by drugs and chemicals                                            |
| E03.2          | Hypothyroidism due to medicaments and other exogenous substances | M80.40         | Drug-induced osteoporosis with pathological fracture, multiple sites                         |
| E06.4          | Drug-induced thyroiditis                                         | M80.42         | Drug-induced osteoporosis with pathological fracture, upper arm                              |
| E16.0          | Drug-induced hypoglycaemia without coma                          | M80.43         | Drug-induced osteoporosis with pathological fracture, forearm                                |
| E23.1          | Drug-induced hypopituitarism                                     | M80.45         | Drug-induced osteoporosis with pathological fracture, pelvic region and thigh                |
| E24.2          | Drug-induced Cushing's syndrome                                  | M80.46         | Drug-induced osteoporosis with pathological fracture, lower leg                              |
| E27.3          | Drug-induced adrenocortical insufficiency                        | M80.48         | Drug-induced osteoporosis with pathological fracture, other site                             |
| E66.1          | Drug-induced obesity                                             | M81.4          | Drug-induced osteoporosis                                                                    |
| G04.0          | Acute disseminated encephalitis                                  | M83.5          | Other drug-induced osteomalacia in adults                                                    |
| G21.0          | Malignant neuroleptic syndrome                                   | M87.11         | Osteonecrosis due to drugs, shoulder region                                                  |
| G21.1          | Other drug-induced secondary parkinsonism                        | M87.12         | Osteonecrosis due to drugs, upper arm                                                        |
| G24.0          | Drug-induced dystonia                                            | M87.15         | Osteonecrosis due to drugs, pelvic region and thigh                                          |
| G25.1          | Drug-induced tremor                                              | M87.16         | Osteonecrosis due to drugs, lower leg                                                        |
| G25.4          | Drug-induced chorea                                              | M87.18         | Osteonecrosis due to drugs, other site                                                       |
| G25.6          | Drug-induced tics and other tics of organic origin               | N14.0          | Analgesic nephropathy                                                                        |
| G44.4          | Drug-induced headache, not elsewhere classified                  | N14.1          | Nephropathy induced by other drugs, medicaments and biological substances                    |
| G61.1          | Serum neuropathy                                                 | N14.2          | Nephropathy induced by unspecified drug, medicament or biological substance                  |
| G62.0          | Drug-induced polyneuropathy                                      | R50.2          | Drug-induced fever                                                                           |
| G72.0          | Drug-induced myopathy                                            | T80.3          | ABO incompatibility reaction                                                                 |
| H40.6          | Glaucoma secondary to drugs                                      | T80.4          | Rh incompatibility reaction                                                                  |
| H91.0          | Ototoxic hearing loss                                            | T80.5          | Anaphylactic shock due to serum                                                              |
| I42.7          | Cardiomyopathy due to drugs and other external agents            | T80.6          | Other serum reactions                                                                        |
| I95.2          | Hypotension due to drugs                                         | T80.8          | Other complications following infusion, transfusion and therapeutic injection                |
| J70.2          | Acute drug-induced interstitial lung disorders                   | T80.9          | Unspecified complication following infusion, transfusion and therapeutic injection           |
| J70.3          | Chronic drug-induced interstitial lung disorders                 | T88.1          | Other complications following immunization, not elsewhere classified                         |
| J70.4          | Drug-induced interstitial lung disorders, unspecified            | T88.2          | Shock due to anaesthesia                                                                     |
| K85.3          | Drug-induced acute pancreatitis                                  | T88.3          | Malignant hyperthermia due to anaesthesia                                                    |
| L10.5          | Drug-induced pemphigus                                           | T88.5          | Other complications of anaesthesia                                                           |
| L23.3          | Allergic contact dermatitis due to drugs in contact with skin    | T88.6          | Anaphylactic shock due to adverse effect of correct drug or medicament properly administered |
| L24.4          | Irritant contact dermatitis due to drugs in contact with skin    | T88.7          | Unspecified adverse effect of drug or medicament                                             |
| L25.1          | Unspecified contact dermatitis due to drugs in contact with skin |                |                                                                                              |
| L27.0          | Generalized skin eruption due to drugs and medicaments           |                |                                                                                              |
| L43.2          | Lichenoid drug reaction                                          |                |                                                                                              |
| L56.0          | Drug phototoxic response                                         |                |                                                                                              |
| L56.1          | Drug photoallergic response                                      |                |                                                                                              |
| M10.20         | Drug-induced gout, multiple sites                                |                |                                                                                              |
| M10.22         | Drug-induced gout, upper arm                                     |                |                                                                                              |
| M10.24         | Drug-induced gout, hand                                          |                |                                                                                              |

## Appendix 2: Trends in patient/provider attachment among older adults in Ontario and Quebec

The plots below demonstrate the nature of patient/provider attachment over time in Ontario and Quebec, respectively. Arguably, barring access barriers or suboptimal quality of care, patients should preferentially seek primary care from the family physician with whom they are enrolled in the interest of ensuring continuity of care. As of 2018 in both provinces, we found that this was the case: most older adults in our cohorts were enrolled with the physician who was also their UPC, and this proportion increased over our observation period. Less than 15% of older adults enrolled in either province routinely sought care from a different family physician. Nonusers (unenrolled individuals with no contact with a family physician most) and enrolled older adults who did not seek care from their family physician were relatively rare in both provinces over the course of the observation period. While some patients may formally disenroll from their family physician, this was quite rare in our sample, occurring in 1-2% of patients per fiscal year in Quebec.

### Ontario

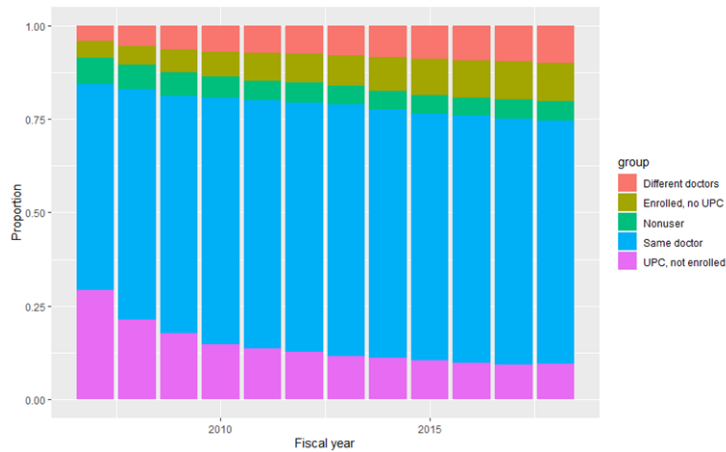

### Quebec

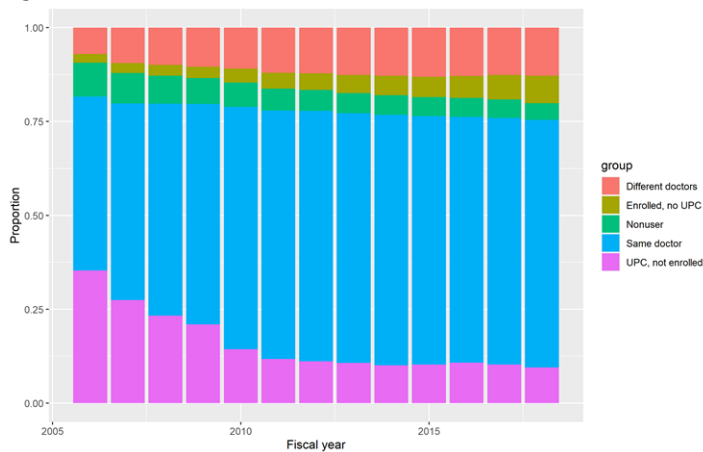

### Appendix 3: Medication trends

#### FHT vs. non-FHT

|                                                        | ON    |       |       |       |         |       |       |       |
|--------------------------------------------------------|-------|-------|-------|-------|---------|-------|-------|-------|
|                                                        | FHT   |       |       |       | Non-FHT |       |       |       |
|                                                        | 2006  | 2010  | 2014  | 2018  | 2006    | 2010  | 2014  | 2018  |
| <b>Pharmaceutical outcomes</b>                         |       |       |       |       |         |       |       |       |
| ADEs (1+) <sup>1</sup>                                 | 0.8%  | 0.8%  | 0.8%  | 1.0%  | 0.7%    | 0.7%  | 0.7%  | 0.8%  |
| Polypharmacy <sup>2</sup>                              | 62.9% | 63.1% | 62.8% | 61.9% | 61.9%   | 62.5% | 61.9% | 60.6% |
| PIPs <sup>3</sup> : specific drug classes/combinations |       |       |       |       |         |       |       |       |
| Opioid (any)                                           | 25.4% | 23.2% | 21.4% | 19.3% | 23.7%   | 22.7% | 20.4% | 18.3% |
| Benzodiazepines                                        | 19.2% | 17.6% | 14.1% | 11.9% | 20.0%   | 17.6% | 14.0% | 11.8% |
| Anticholinergics                                       | 12.5% | 11.6% | 10.3% | 9.1%  | 11.9%   | 10.7% | 9.5%  | 8.3%  |
| Proton pump inhibitors (PPIs)                          | 25.5% | 29.8% | 31.9% | 30.8% | 24.0%   | 28.5% | 30.4% | 29.4% |
| Opioid + benzodiazepines                               | 8.0%  | 6.8%  | 5.4%  | 4.5%  | 7.7%    | 6.9%  | 5.3%  | 4.3%  |
| NSAIDs+anticoagulants                                  | 1.3%  | 1.3%  | 1.2%  | 1.1%  | 1.3%    | 1.2%  | 1.1%  | 1.0%  |
| Long-acting sulfonylureas                              | 6.0%  | 3.3%  | 1.1%  | 0.4%  | 6.8%    | 4.0%  | 1.5%  | 0.6%  |
| NSAIDs + concurrent antiplatelet (without PPI)         | 1.0%  | 1.1%  | 0.8%  | 0.5%  | 1.0%    | 1.1%  | 0.8%  | 0.6%  |

<sup>1</sup>ADE=Adverse drug event (based on CIHI's list of ICD-10 codes). <sup>2</sup>Based conversion of DINs to 3rd level ATC codes. <sup>3</sup>PIP=potentially inappropriate prescription.

**GMF vs. non-GMF**

|                                                        | QC    |       |       |       |         |       |       |       |
|--------------------------------------------------------|-------|-------|-------|-------|---------|-------|-------|-------|
|                                                        | GMF   |       |       |       | Non-GMF |       |       |       |
|                                                        | 2006  | 2010  | 2014  | 2018  | 2006    | 2010  | 2014  | 2018  |
| <b>Pharmaceutical outcomes</b>                         |       |       |       |       |         |       |       |       |
| ADEs (1+) <sup>1</sup>                                 | 1.9%  | 2.0%  | 1.9%  | 1.7%  | 1.6%    | 1.6%  | 1.6%  | 1.6%  |
| Polypharmacy <sup>2</sup>                              | 66.6% | 68.1% | 68.4% | 66.7% | 60.6%   | 62.7% | 62.0% | 61.6% |
| PIPs <sup>3</sup> : specific drug classes/combinations |       |       |       |       |         |       |       |       |
| Opioid (any)                                           | 10.7% | 10.4% | 11.4% | 11.2% | 9.8%    | 9.6%  | 10.4% | 10.5% |
| Benzodiazepines                                        | 35.0% | 31.1% | 27.7% | 22.7% | 30.5%   | 27.8% | 24.1% | 20.3% |
| Anticholinergics                                       | 14.0% | 13.5% | 13.4% | 13.1% | 12.5%   | 12.5% | 12.2% | 12.0% |
| Proton pump inhibitors (PPIs)                          | 28.7% | 33.7% | 37.4% | 38.3% | 26.1%   | 30.4% | 32.9% | 34.4% |
| Opioid + benzodiazepines                               | 1.8%  | 1.4%  | 1.3%  | 1.0%  | 1.6%    | 1.3%  | 1.1%  | 0.9%  |
| NSAIDs+anticoagulants                                  | 0.3%  | 0.2%  | 0.2%  | 0.2%  | 0.3%    | 0.2%  | 0.2%  | 0.2%  |
| Long-acting sulfonyleureas                             | 5.7%  | 3.5%  | 2.3%  | 1.8%  | 5.5%    | 3.7%  | 2.4%  | 1.9%  |
| NSAIDs + concurrent antiplatelet (without PPI)         | 0.4%  | 0.3%  | 0.2%  | 0.1%  | 0.3%    | 0.3%  | 0.1%  | 0.1%  |

<sup>1</sup>ADE=adverse drug event (based on CIHI's list of ICD-10 codes). <sup>2</sup>Based conversion of DINs to 3rd level ATC codes. <sup>3</sup>PIP=potentially inappropriate prescription. NSAIDs: nonsteroidal anti-inflammatory drugs

## Appendix 4: Other PIP trends, by province/enrollment status

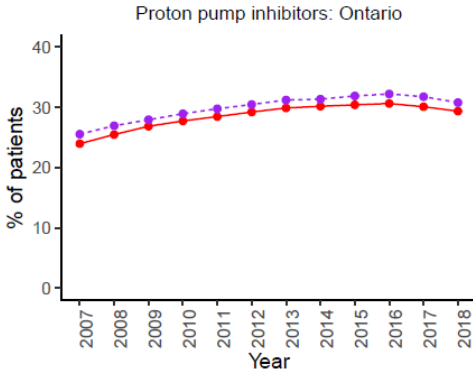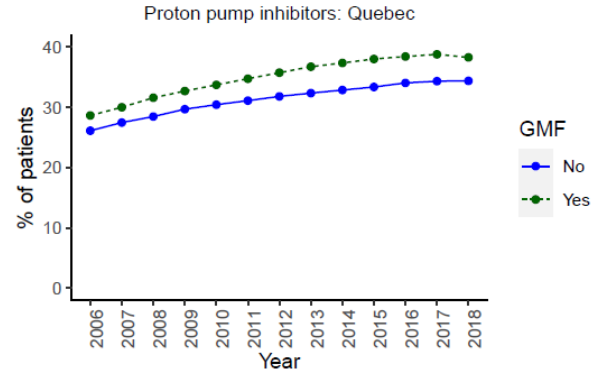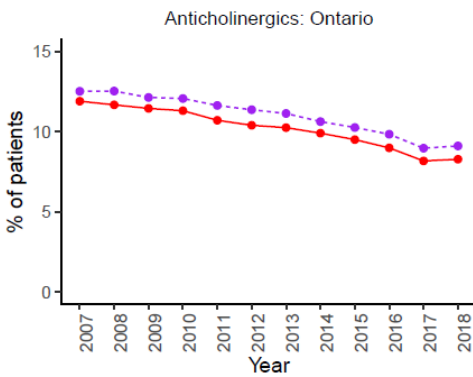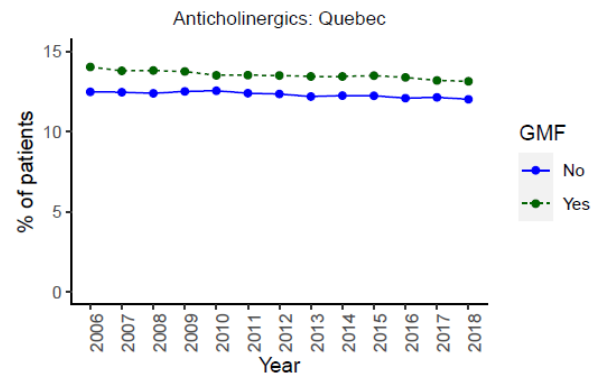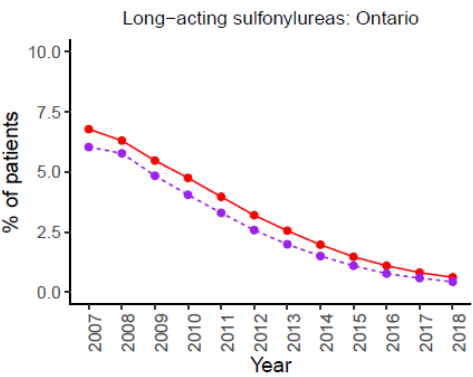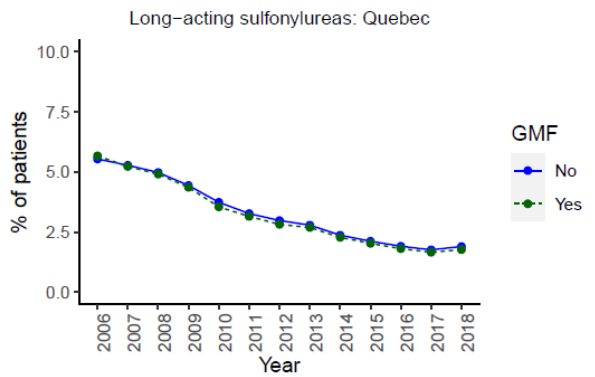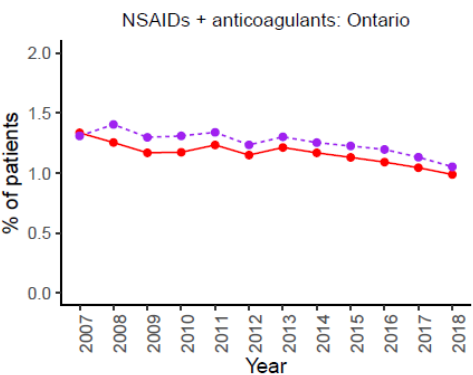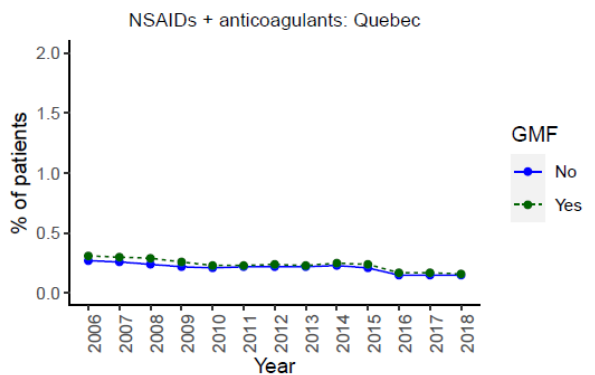

Supplement: MOESM1 [file 23907856]
